# Supplementary material for: Spontaneous formation of pH-sensitive, stable vesicles in aqueous solution of N-[4-n-octyloxybenzoyl]-l-histidine
Source: Royal Society of Chemistry journal article supplement (doi:10.1039/c000898b), 2010-01-01
Supplement: c000898b.pdf [file c000898b.pdf]

# Spontaneous Formation of pH-Sensitive, Stable Vesicles in Aqueous Solution of N-[4-n-Octyloxybenzoyl]-L-histidine

Trilochan Patra, Sampad Ghosh and Joykrishna Dey\*

Department of Chemistry, Indian Institute of Technology, Kharagpur-721 302  
India

## Electronic Supporting Information

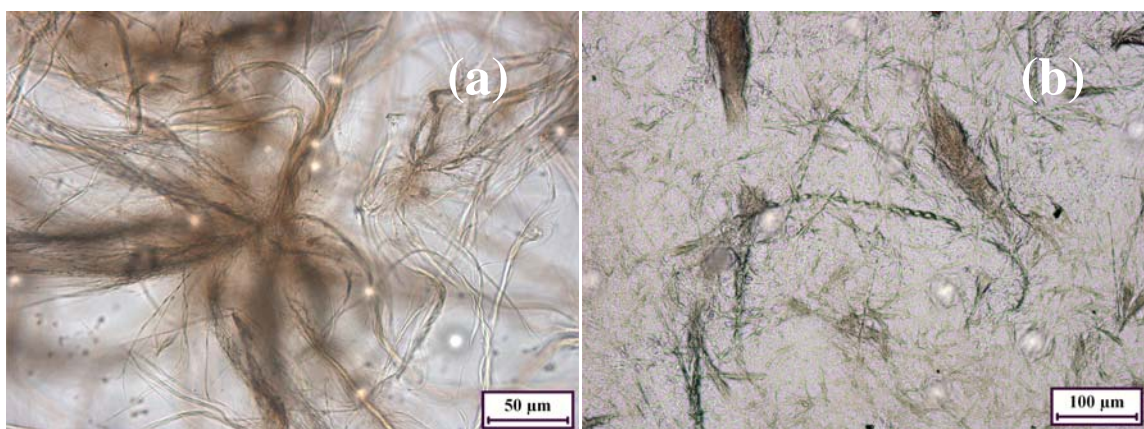

**Figure S1.** Optical microscopic images (a, b) of concentrated SOBH in pH 12.

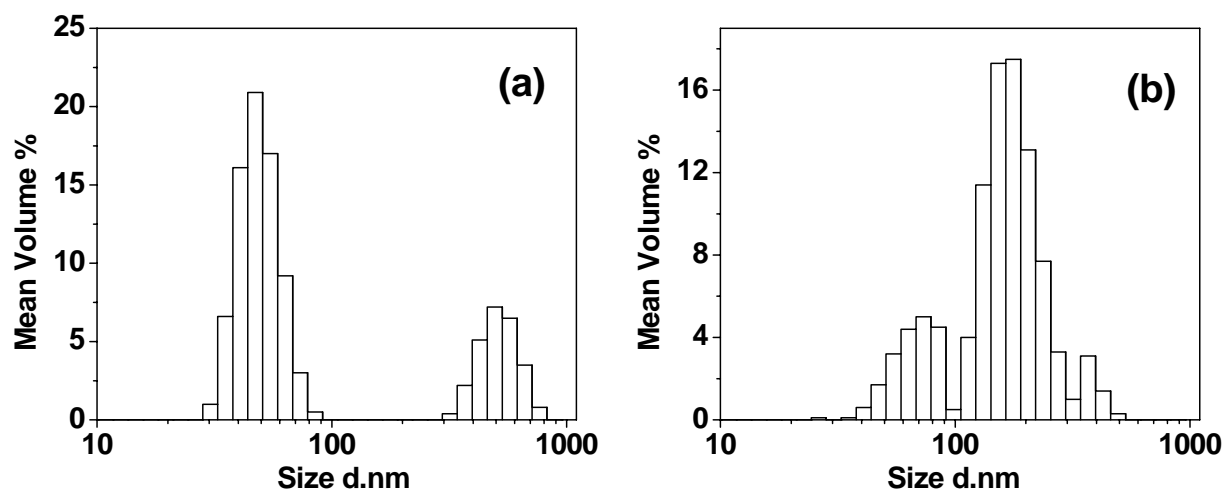

**Figure S2.** Size distribution profiles of aggregates in (a) 0.5 mM SOBH containing 10 mol % Chol at pH 8.0, (b) 2.0 mM SOBH containing 10 mol % Chol at pH 12.
